# Supplementary material for: Photo‐Enhanced Synergistic Induction of Ferroptosis for Anti‐Cancer Immunotherapy
Source: PubMed Central journal article supplement — Adv Healthc Mater. 2023 Jul 20;12(27):2300994. doi: 10.1002/adhm.202300994 (PMC11468986; doi:10.1002/adhm.202300994), 2023-07-20
Supplement: ADHM-12-2300994-s001.pdf [file ADHM-12-2300994-s001.pdf]

# ADVANCED HEALTHCARE MATERIALS

## Supporting Information

for *Adv. Healthcare Mater.*, DOI 10.1002/adhm.202300994

Photo-Enhanced Synergistic Induction of Ferroptosis for Anti-Cancer Immunotherapy

*Yang Zhou, Kang Chen, Wing Kak Lin, Jinzhao Liu, Weirong Kang, Yaming Zhang, Ranyao Yang, Leigang Jin, Yiyun Cheng, Aimin Xu\* and Weiping Wang\**

## Supporting Information

### **Photo-enhanced synergistic induction of ferroptosis for anti-cancer immunotherapy**

*Yang Zhou, Kang Chen, Wing Kak Lin, Jinzhao Liu, Weirong Kang, Yaming Zhang, Ranyao Yang, Leigang Jin, Yiyun Cheng, Aimin Xu\*, Weiping Wang\**

Yang Zhou and Kang Chen contributed equally to this work.

Yang Zhou, Kang Chen, Wing Kak Lin, Jinzhao Liu, Weirong Kang, Yaming Zhang,  
Weiping Wang

State Key Laboratory of Pharmaceutical Biotechnology, The University of Hong Kong, Hong Kong, China

Department of Pharmacology and Pharmacy, Li Ka Shing Faculty of Medicine, The University of Hong Kong, Hong Kong, China

Dr. Li Dak-Sum Research Centre, The University of Hong Kong, Hong Kong, China

E-mail: [wangwp@hku.hk](mailto:wangwp@hku.hk)

Kang Chen, Ranyao Yang, Leigang Jin, Aimin Xu

State Key Laboratory of Pharmaceutical Biotechnology, The University of Hong Kong, Hong Kong, China

Department of Medicine, Li Ka Shing Faculty of Medicine, The University of Hong Kong, Hong Kong, China

E-mail: [amxu@hku.hk](mailto:amxu@hku.hk)

Yiyun Cheng

Shanghai Frontiers Science Center of Genome Editing and Cell Therapy, Shanghai Key Laboratory of Regulatory Biology, Institute of Biomedical Sciences and School of Life Sciences, East China Normal University, Shanghai, China

| Name                         | Cat #    | Fluorophore  | Company                            |
|------------------------------|----------|--------------|------------------------------------|
| Anti-GPX4 antibody           | A1933    | \            | Abclonal                           |
| Anti-LC3 antibody            | Ab192890 | \            | Abcam                              |
| Anti-HMGB1 antibody          | A19529   | \            | Abclonal                           |
| Anti-Calreticulin antibody   | A1066    | \            | Abclonal                           |
| Anti-GAPDH antibody          | AC002    | \            | Abclonal                           |
| Anti-FSP1 antibody           | 24972    | \            | Cell Signaling<br>Technology (CST) |
| Anti-CD8 antibody            | 98941    | \            | CST                                |
| Anti-TNF $\alpha$ -antibody  | 11948    | \            | CST                                |
| Anti-granzyme B-antibody     | 44153    | \            | CST                                |
| Anti-mouse PD-L1             | BE0101   | \            | Bio X Cell                         |
| Anti-rabbit IgG H&L<br>(HRP) | ab6721   | \            | Abcam                              |
| Anti-IA/IE antibody          | 107605   | FITC         | Biologend                          |
| Anti-CD11c antibody          | 117321   | Pacific Blue | Biologend                          |
| Anti-CD80 antibody           | 104714   | APC          | Biologend                          |
| Anti-CD86 antibody           | 105014   | PE/Cy7       | Biologend                          |
| Anti-CD45 antibody           | 157213   | FITC         | Biologend                          |
| Anti-CD3 antibody            | 100221   | APC/Cy7      | Biologend                          |
| Anti-CD4 antibody            | 100427   | Pacific Blue | Biologend                          |
| Anti-CD8 antibody            | 100733   | Percep/Cy5.5 | Biologend                          |
| Anti-rabbit IgG H&L          | ab175471 | AF568        | Abcam                              |

**Table S1.** Antibodies used in this study for immunofluorescence, immunohistochemistry, flow cytometry test, and anti-PD-L1 immunotherapy.

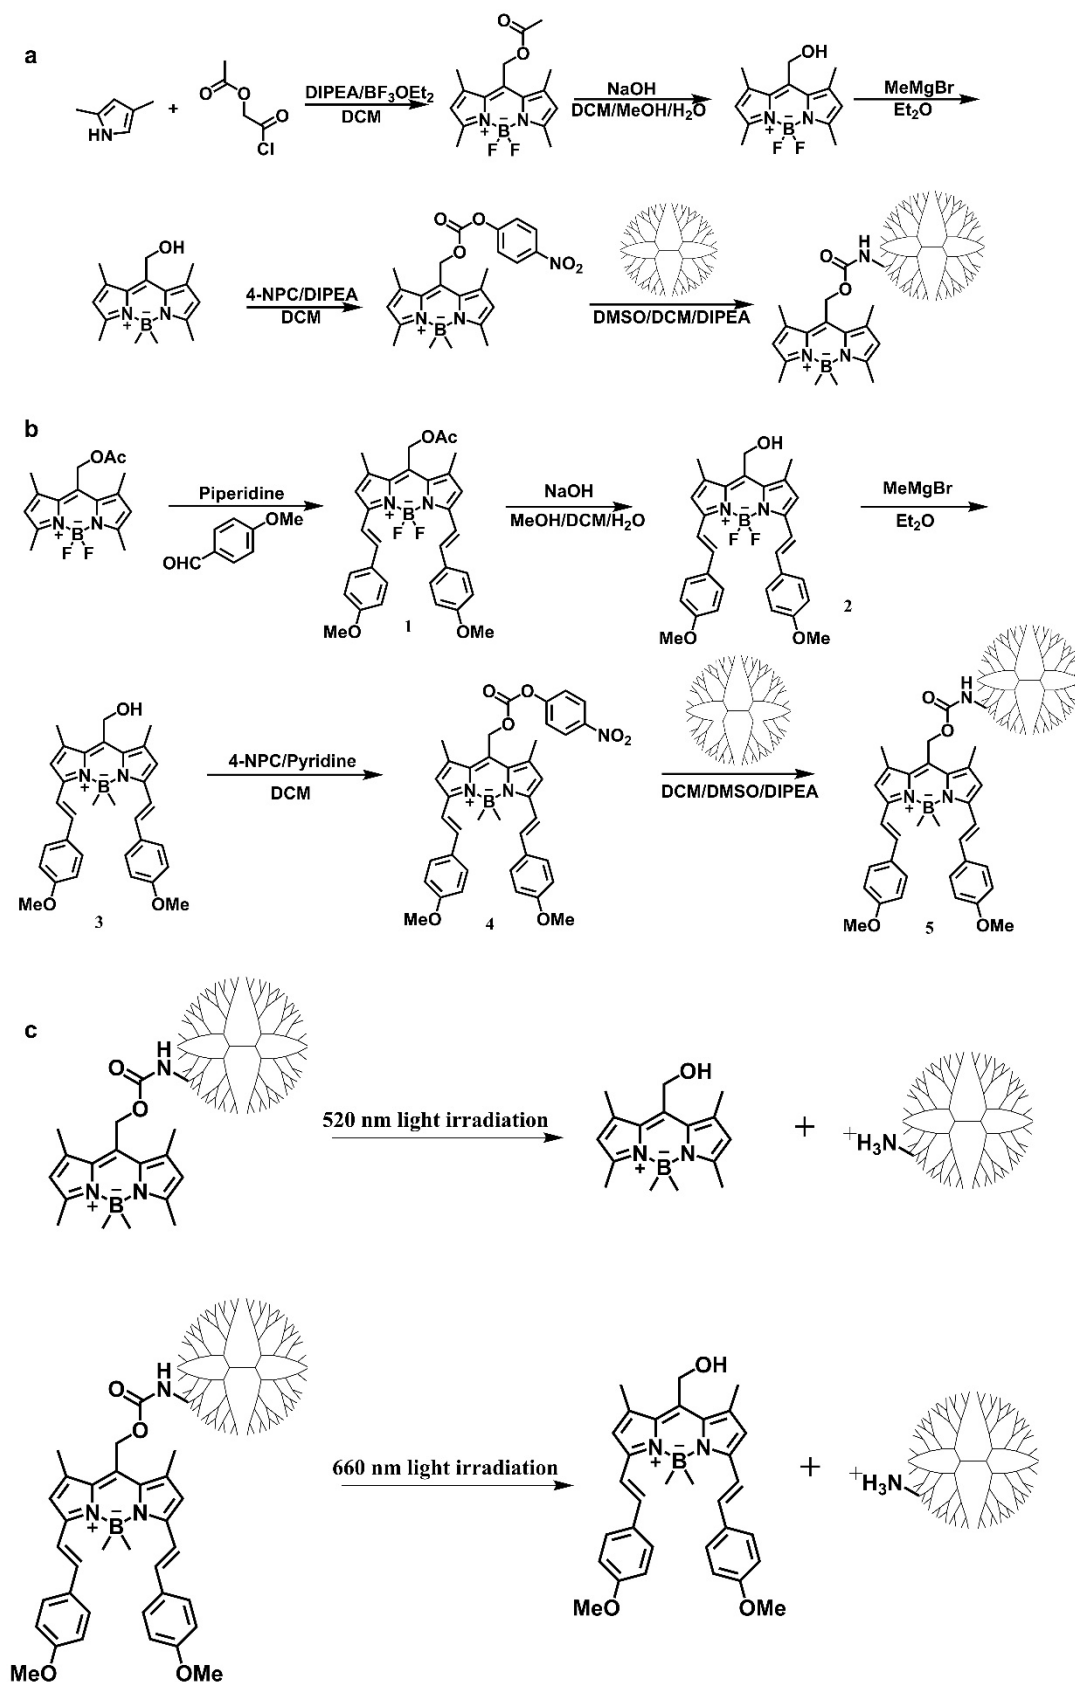

**Figure S1.** Synthesis route of green light-responsive BODIPY-modified PAMAM (BMP) (a) and NIR light-responsive BODIPY-modified PAMAM (NBMP) (b). (c) Photocleavage of BODIPY molecules from BMP.

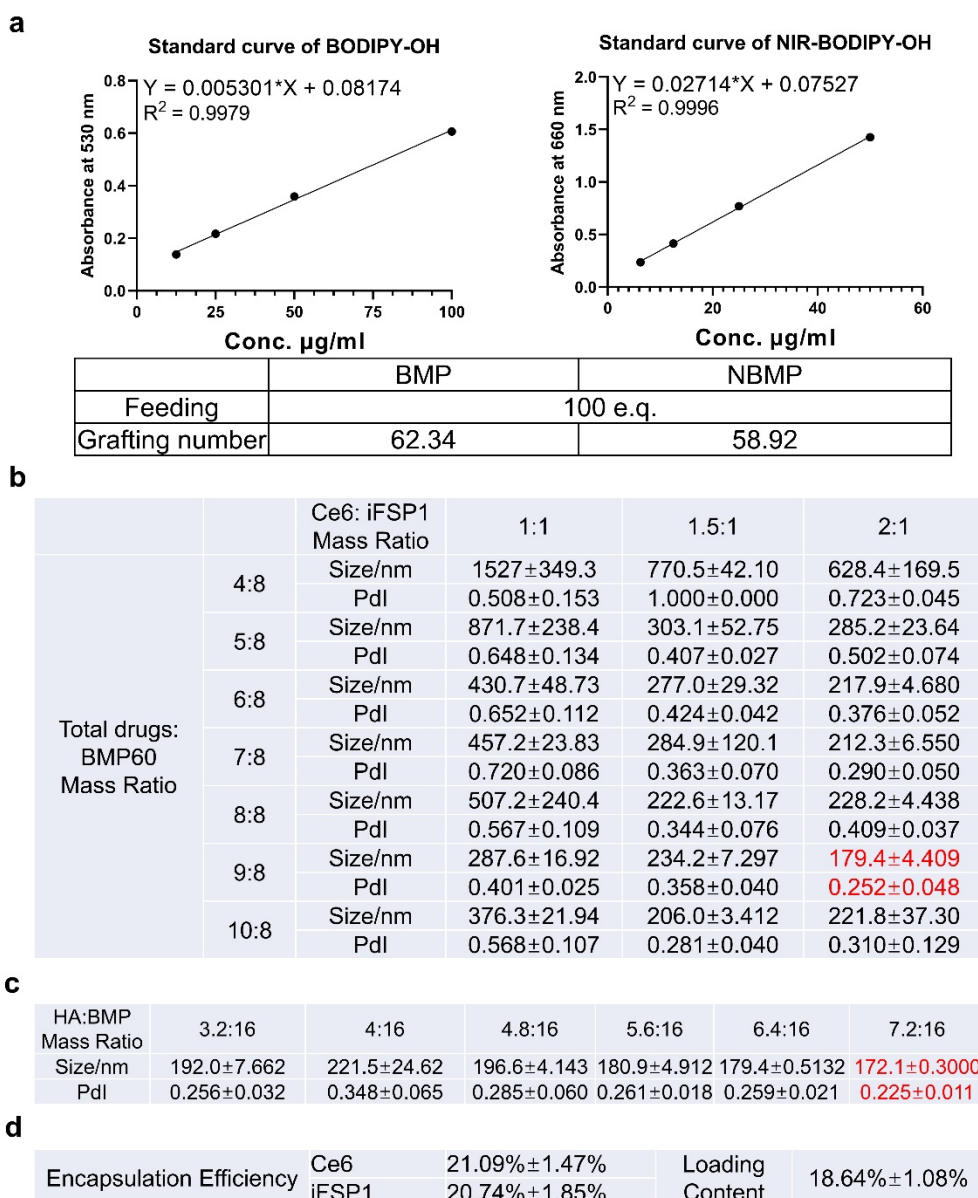

**Figure S2.** (a) Standard curves and grafting number calculation of green light-responsive and NIR light-responsive BODIPY. Formulation optimization of BMP-Ce6&iFSP1 nanoparticles (b) and HA-coated BMP-Ce6&iFSP1 nanoparticles (c). (d) Encapsulation efficiency and loading content evaluation of HBCiF-NPs.

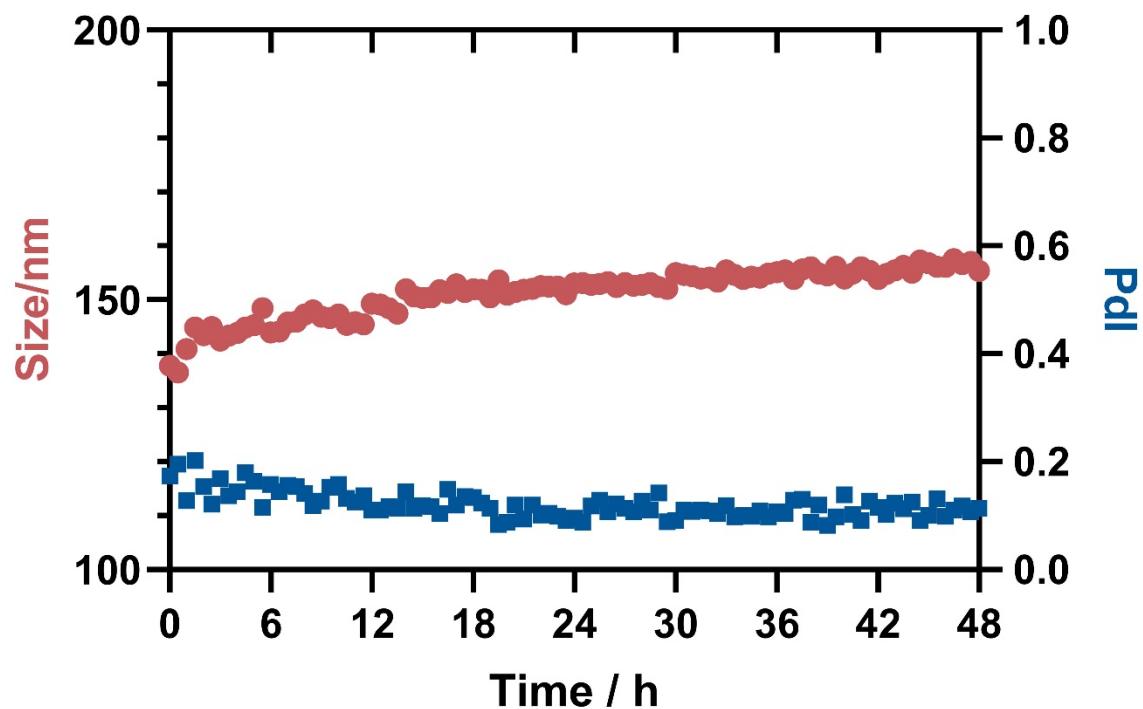

**Figure S3.** Stability measurement of HBCiF-NPs in DMEM complete medium containing fetal bovine serum for 48 h at 37 °C.

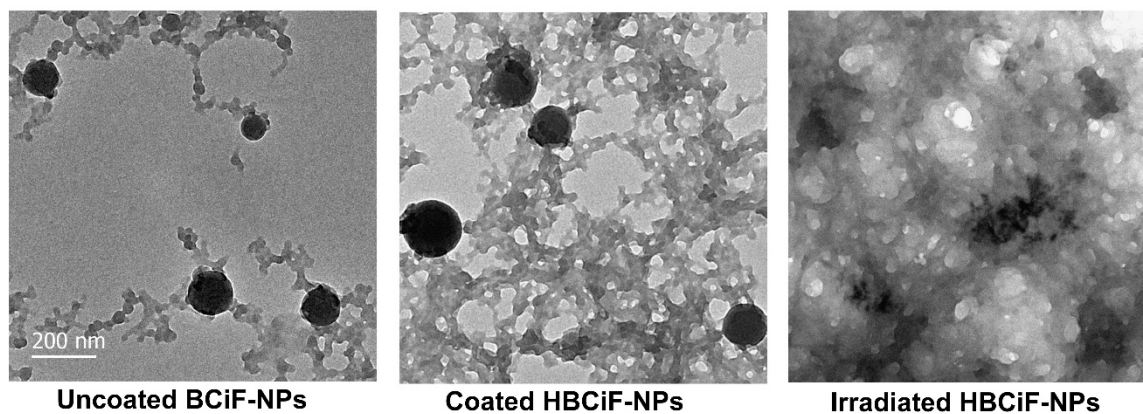

**Figure S4.** TEM images of BCiF-NPs, HBCiF-NPs, and 520 nm light-irradiated HBCiF-NPs. Scale bar: 200 nm. Light irradiation: Xe lamp, 520 nm, 25 mW/cm<sup>2</sup>, 3 min.

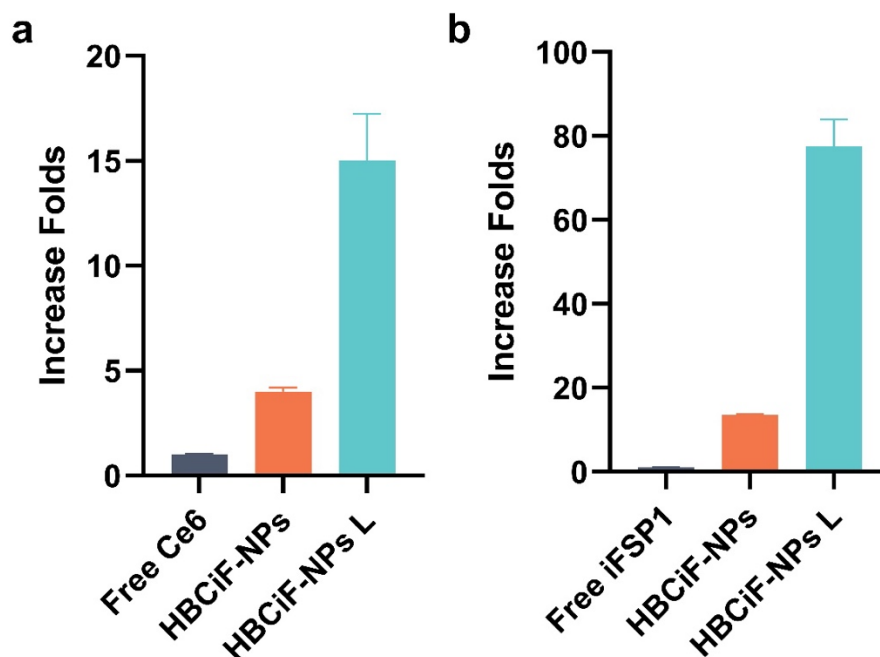

**Figure S5.** Fluorescence increase folds analyzed by flow cytometry of A549 cells treated with free Ce6 or iFSP1, HBCiF-NPs, and 520 nm light-irradiated HBCiF-NPs for 4 h. Fluorescence of iFSP1 and Ce6 was detected by DAPI and Qdot655 channel, respectively. L: light irradiation. Light irradiation: Xe lamp, 520 nm, 25 mW/cm<sup>2</sup>, 3 min. n=3, means  $\pm$  SD.

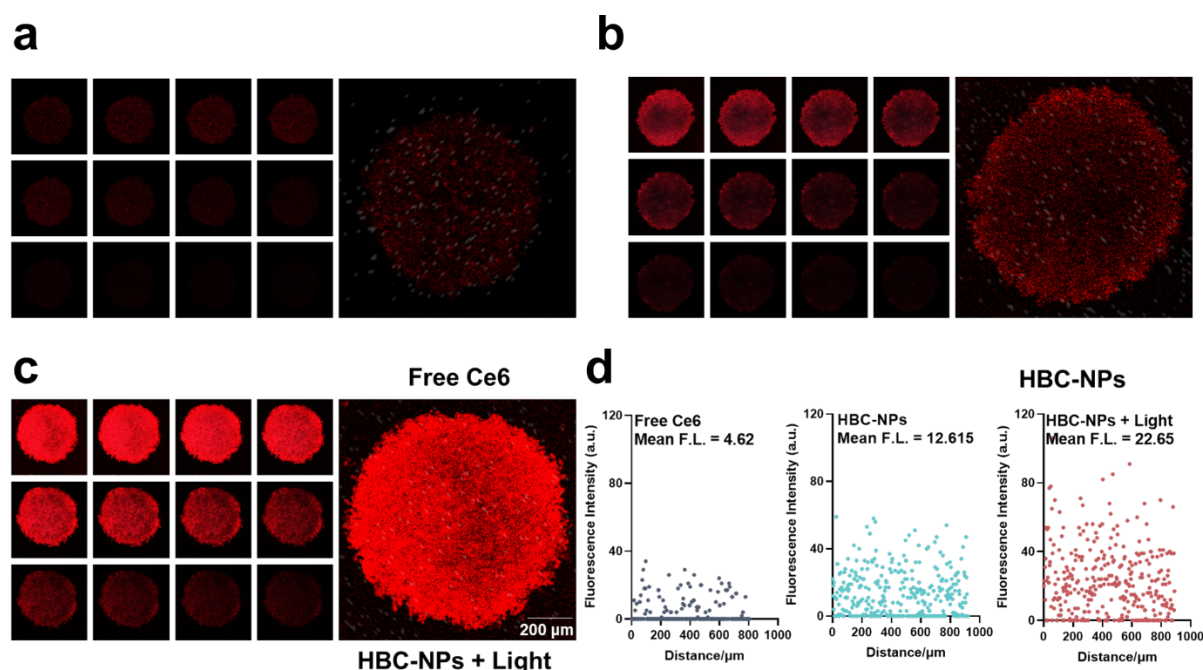

**Figure S6.** CLSM images of A549 tumor spheroids treated with free Ce6 (a), HBC-NPs (b), and HBC-NPs + light (c). Ce6 was visualized by AF647 channel (scale bar: 200  $\mu$ m). (d) Fluorescence intensities of 324, 369, 357 points along spheroid diameters in the Free Ce6, HBC-NPs, and HBC-NPs + Light groups, respectively, analyzed by ZEN3.4 (blue edition). Light irradiation: Xe lamp, 520 nm, 25 mW/cm<sup>2</sup>, 3 min.



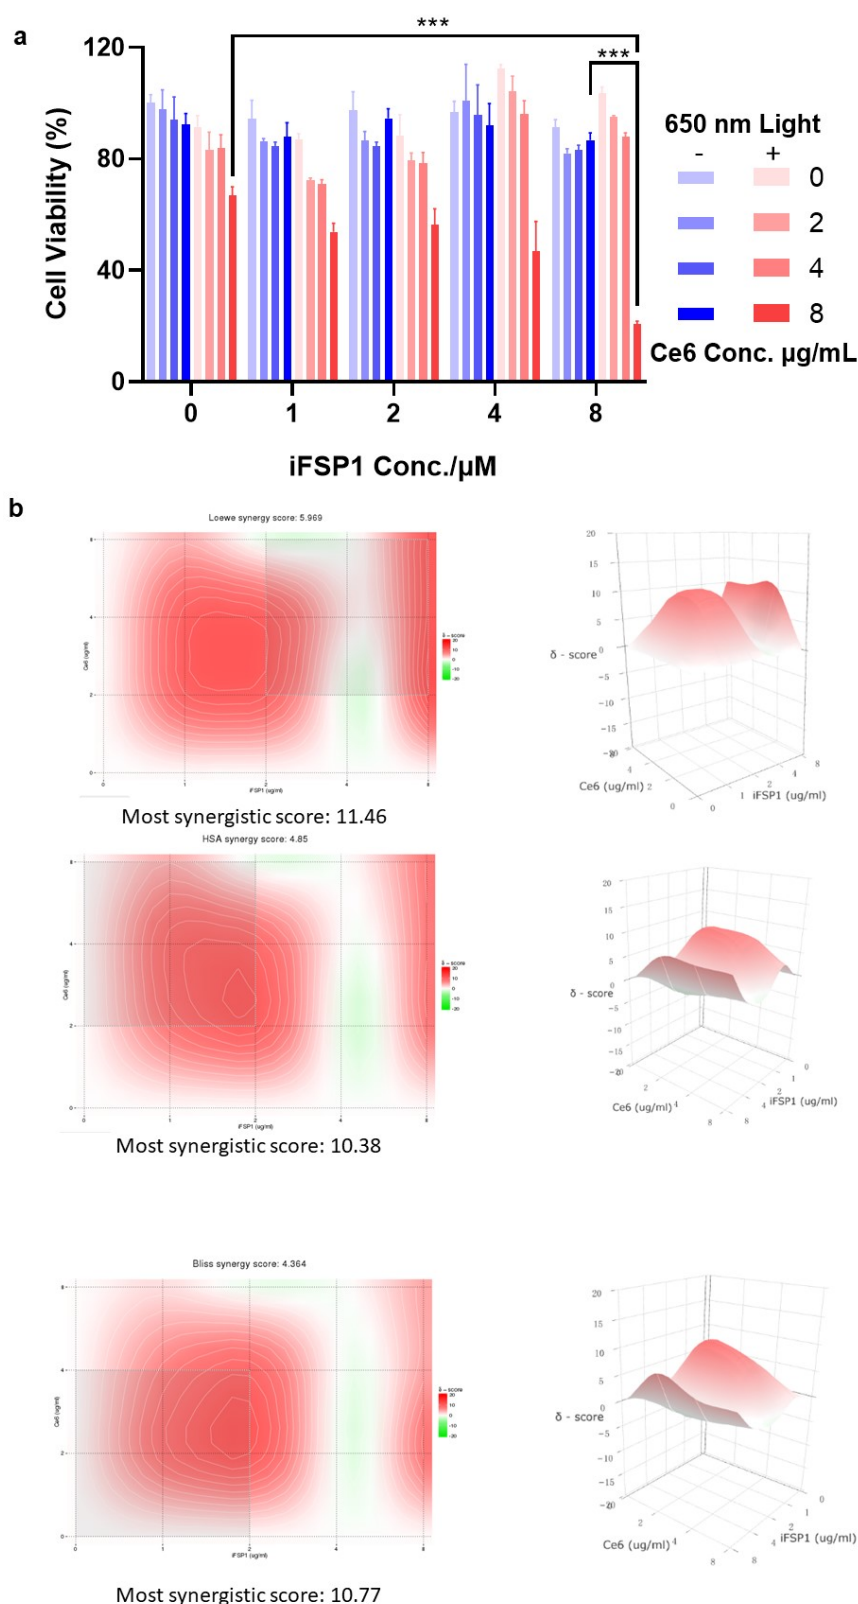

**Figure S7.** (a) MTT assay of Ce6 and iFSP1 dose-dependent cytotoxicity on A549 cells (means  $\pm$  SD, n=3). Light irradiation: Xe lamp, 650 nm, 5 mW/cm<sup>2</sup>, 30 min (b) Synergism analysis of iFSP1 and Ce6 (analysis was completed by SynergyFinder).



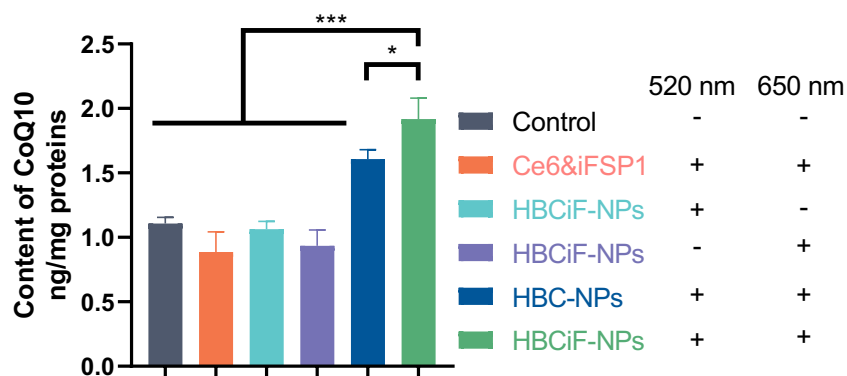

**Figure S8.** Measurement of intracellular CoQ10 in 4T1 cells by ELISA. Light irradiation: Xe lamp, 520 nm, 25 mW/cm<sup>2</sup>, 3 min; 650 nm, 5 mW/cm<sup>2</sup>, 30 min. n=4. \*p<0.05, \*\*\*p<0.001

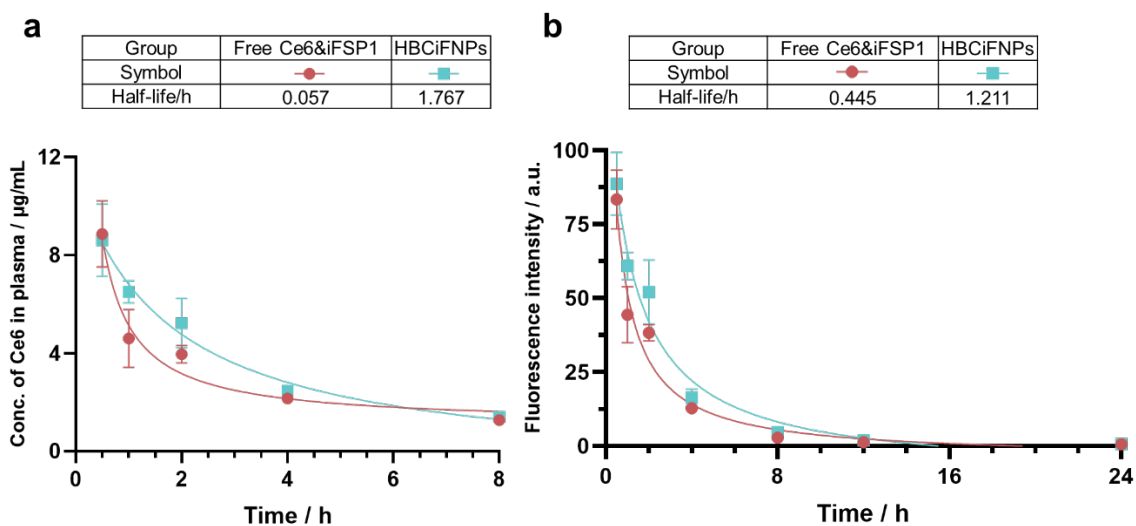

**Figure S9.** Pharmacokinetic study of Ce6 in the plasma of BALB/c mice by HPLC (a) and fluorescence intensity (b) administered with free Ce6&iFSP1 and HBCiF-NPs, separately. Ce6 dosage: 3 mg/kg. n=5, means ± SD.

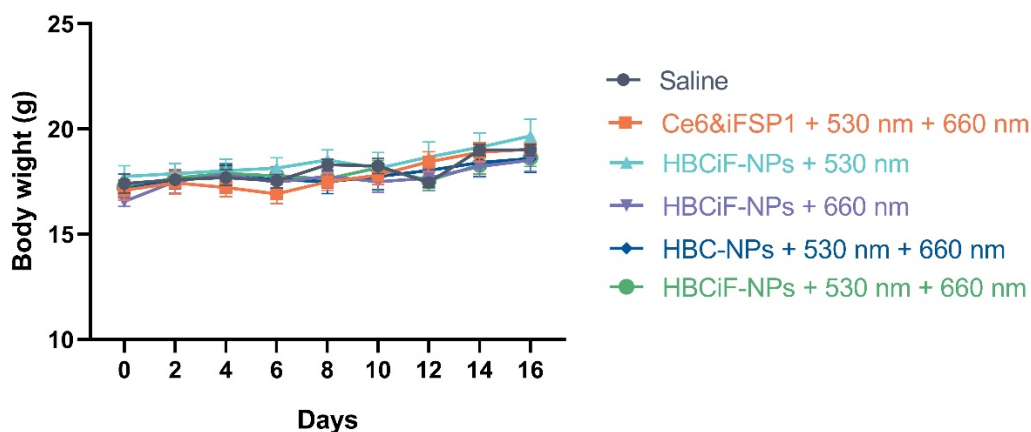

**Figure S10.** Mouse body weight in response to different treatments as shown in the figure. Light irradiation: Laser, 530 nm, 80 mW/cm<sup>2</sup>, 5 min; 660 nm, 20 mW/cm<sup>2</sup>, 1 min. Data are means  $\pm$  SD, n=5.

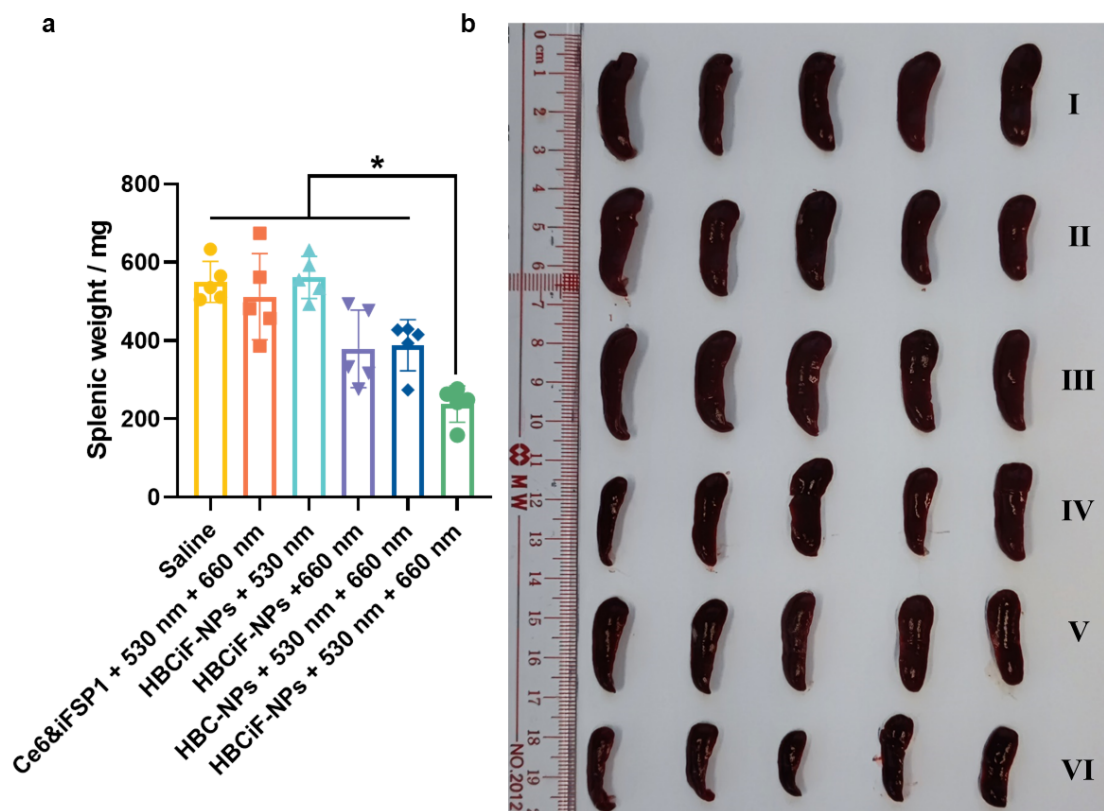

**Figure S11.** Splenic weight (a) and spleen photo (b) of 4T1 tumor-bearing mice after different treatments as shown in the figure. Light irradiation: Laser, 530 nm, 80 mW/cm<sup>2</sup>, 5 min; 660 nm, 20 mW/cm<sup>2</sup>, 1 min. Data are means  $\pm$  SD. \*p<0.05.

Ivan-ChenKang-NIR-BODIPY-CDC13-28Jun2022. 1. fid  
Dark greenish blue, long, light sensitive

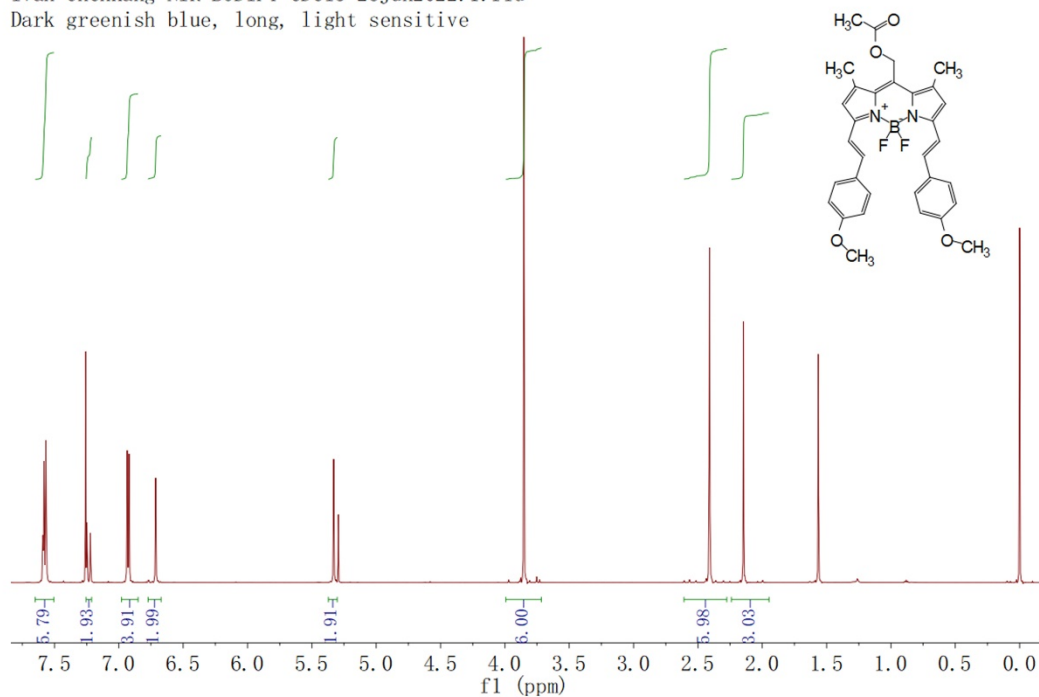

**Figure S12.** <sup>1</sup>H-NMR spectrum of NIR-BODIPY-Me<sub>2</sub>-OAc.

Ivan-ChenKang-CK-2-CDC13-14Sep2022. 1. fid  
Dark blue, long, light sensitive

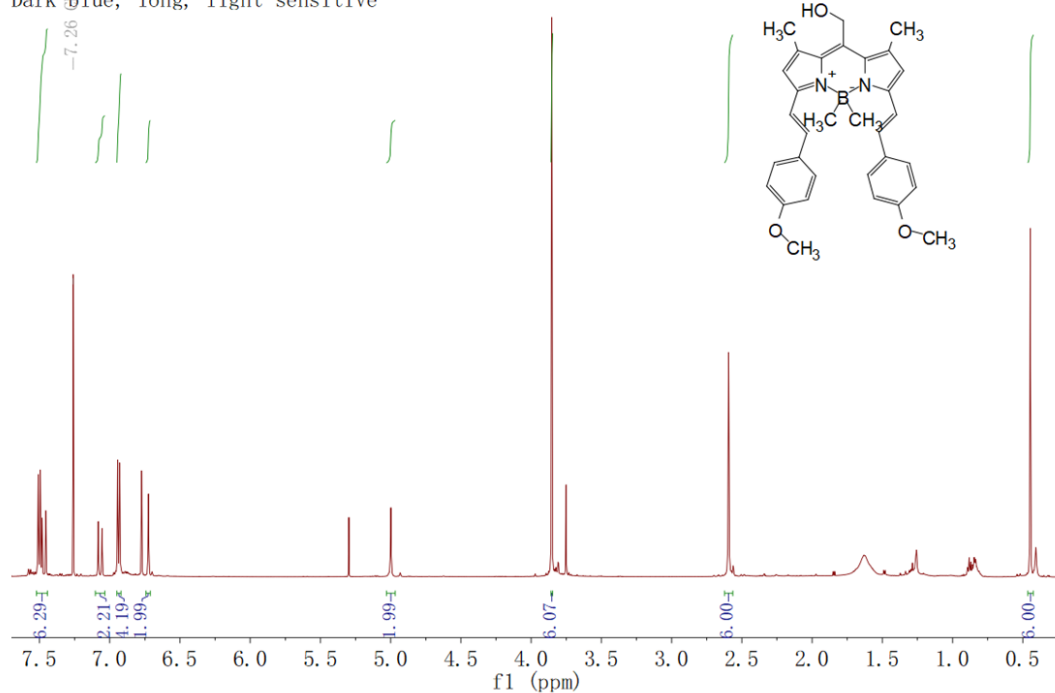

**Figure S13.** <sup>1</sup>H-NMR spectrum of NIR-BODIPY-Me<sub>2</sub>-OH.

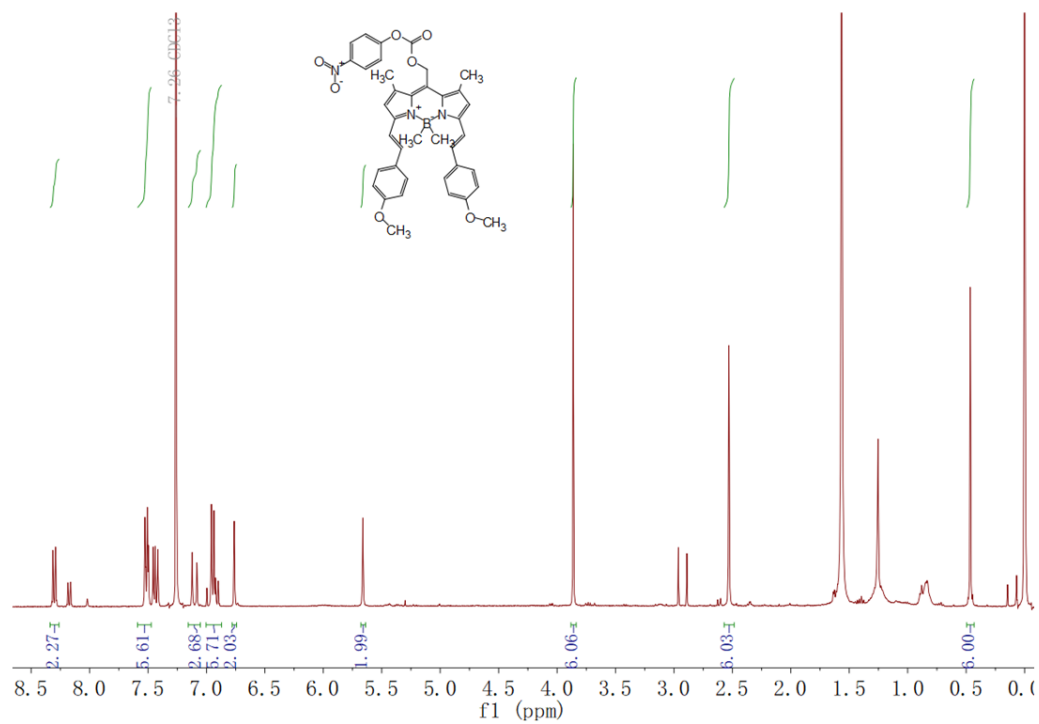

**Figure S14.**  $^1\text{H-NMR}$  spectrum of NIR-BODIPY-Me<sub>2</sub>-4NPC.

Ivan-ChenKang-CK-1-DMSO-d6-14Sep2022. 1. fid  
Dark blue, long, light sensitive

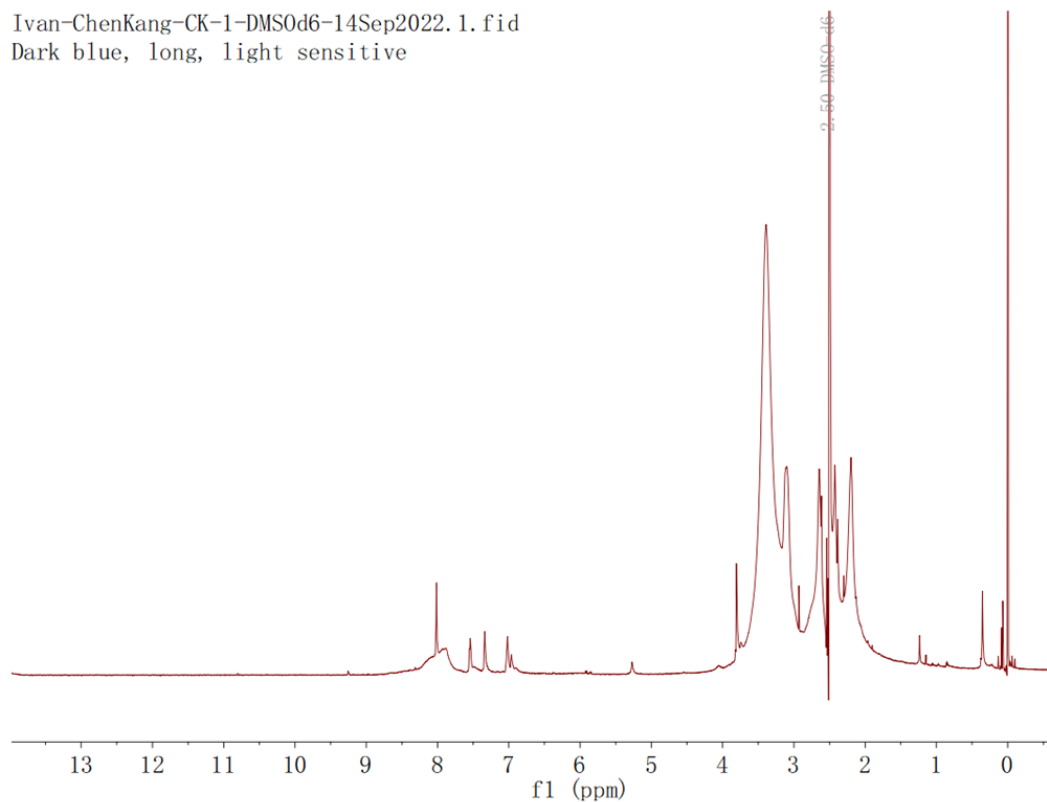

**Figure S15.**  $^1\text{H-NMR}$  spectrum of NBMP.

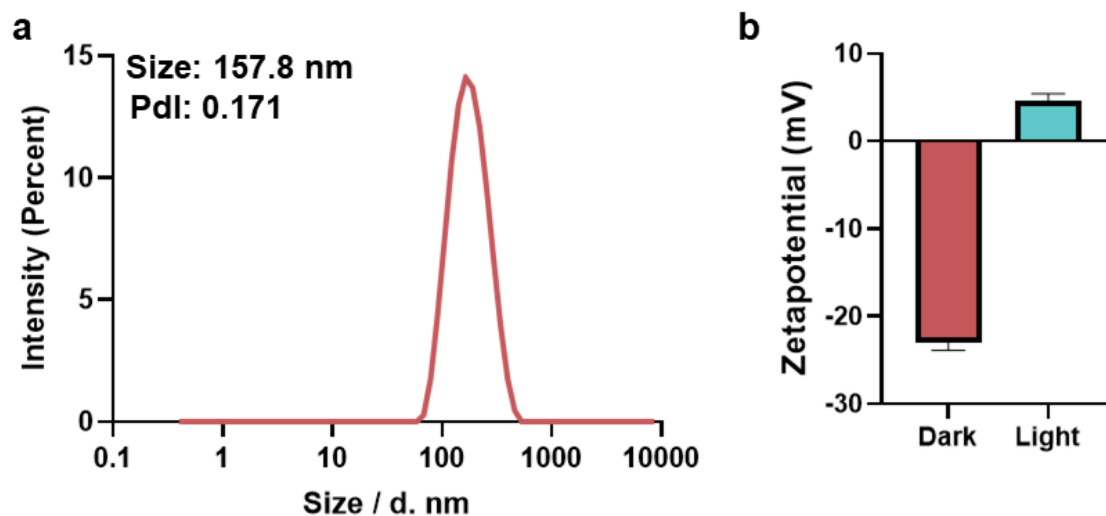

**Figure S16.** (a) Size distribution of HNCiF-NPs. (b) Zeta potential of HNCiF-NPs with or without light irradiation. Light irradiation: Xe lamp, 650 nm, 50 mW/cm<sup>2</sup>, 5 min (means  $\pm$  SD, n=3).

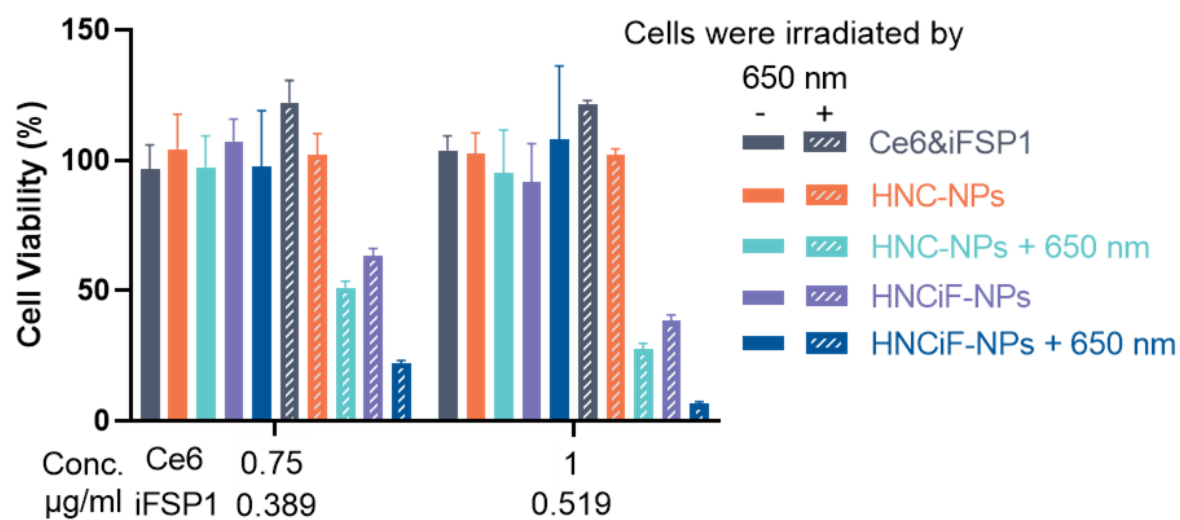

**Figure S17.** MTT assay of Ce6/iFSP1 dose-dependent cytotoxicity on 4T1 cells with different treatments as mentioned in the figure. Light irradiation: 650 nm light, 50 mW/cm<sup>2</sup>, 5 min for nanoparticle pre-irradiation, and 5 mW/cm<sup>2</sup>, 15 min for cell irradiation (means  $\pm$  SD, n=3).

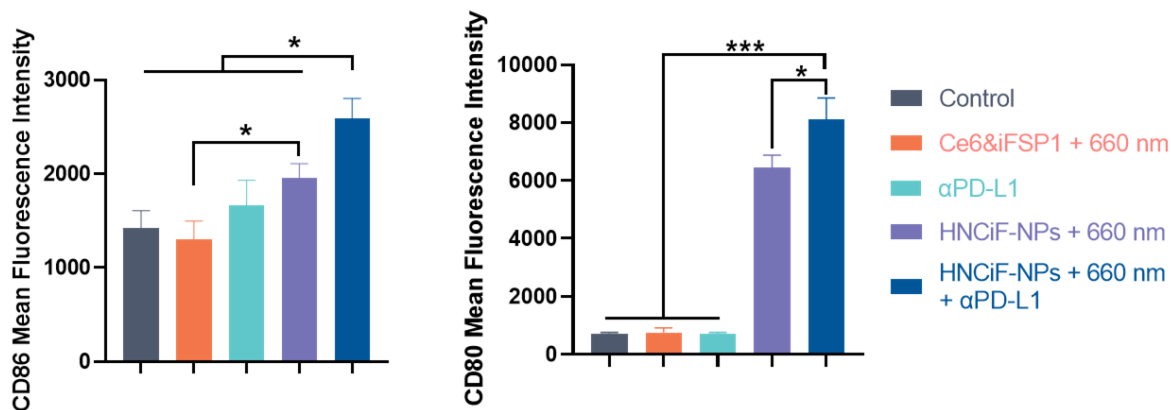

**Figure S18.** Mean fluorescence intensity analysis on CD80/CD86 fluorescent antibody-treated splenic DCs from the mice with different treatments as shown in the figure (means  $\pm$  SD, n=3). Light irradiation: Laser, 660 nm, 60 mW/cm<sup>2</sup>, 1 min.

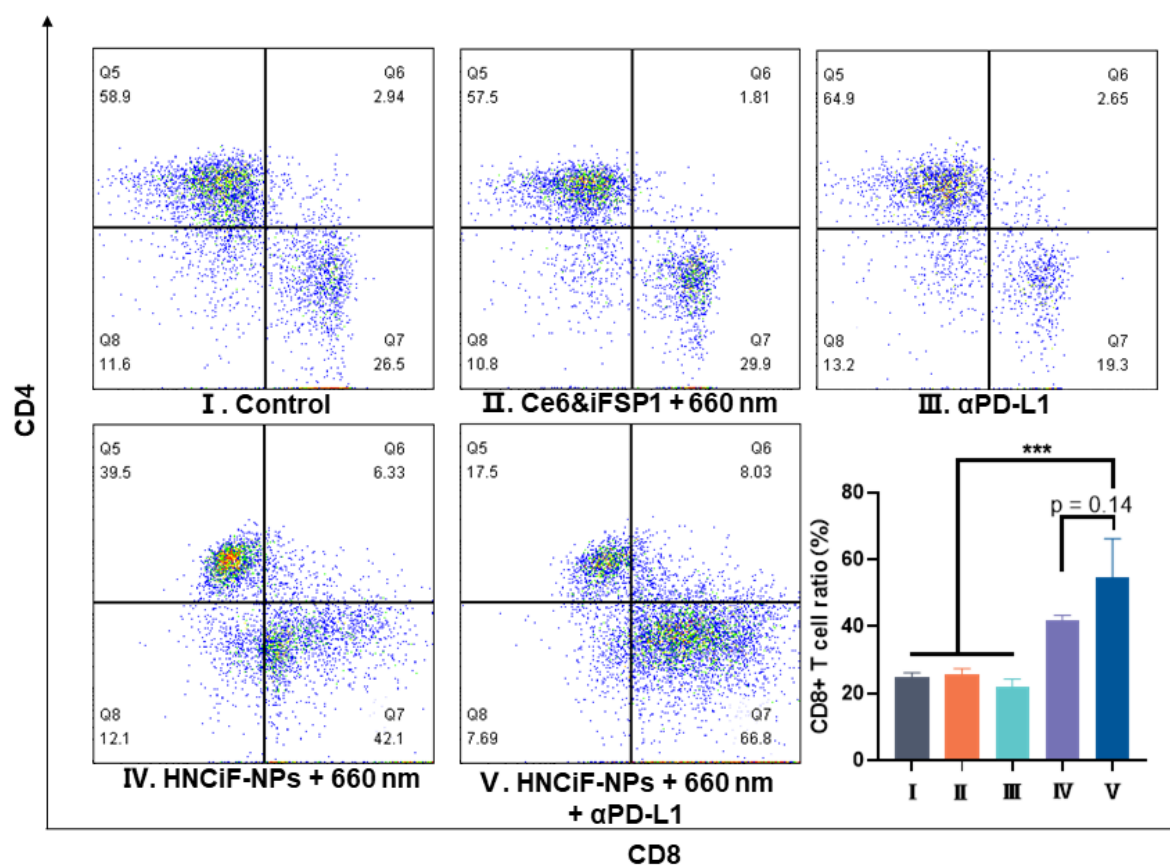

**Figure S19.** Percentage splenic CD8<sup>+</sup> T cells within the CD3<sup>+</sup> cells of the mice with different treatments (means  $\pm$  SD, n=3). Light irradiation: Laser, 660 nm, 60 mW/cm<sup>2</sup>, 1 min.

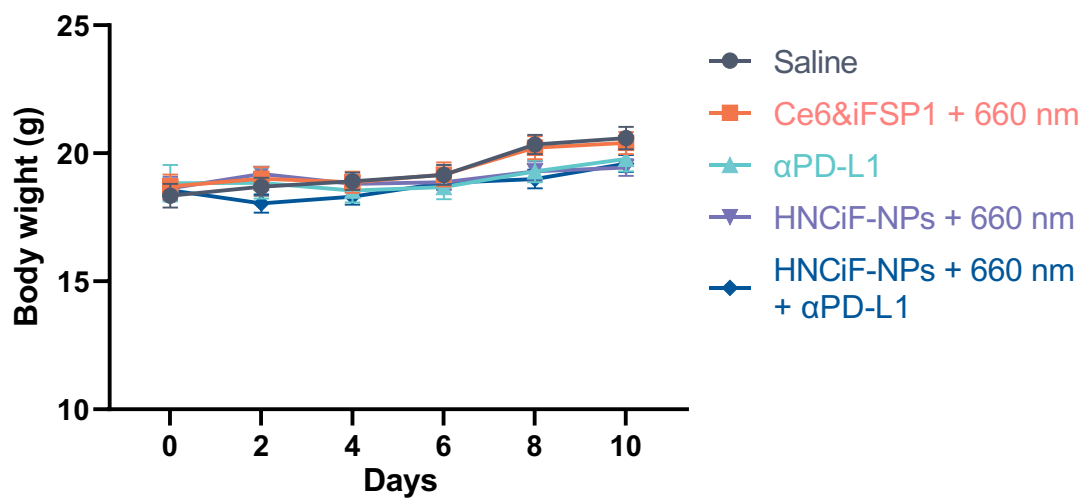

**Figure S20.** Mouse body weight in response to different treatments as shown in the figure (means  $\pm$  SD, n=5). Light irradiation: Laser, 660 nm, 60 mW/cm<sup>2</sup>, 1 min.
